# Supplementary material for: Identification of Volatile Organic Compounds in Extremophilic Bacteria and Their Effective Use in Biocontrol of Postharvest Fungal Phytopathogens
Source: PubMed Central journal article supplement (PMC8633403; doi:10.3389/fmicb.2021.773092), 2021-11-12
Supplement: Data_Sheet_1.pdf [file Data_Sheet_1.pdf]

## *Supplementary Material*

**Table S1.** Full spectrum of volatile compounds identified by GC/MS after HS-SPME. Reference (Ref) for each compound were assigned arbitrary for further analysis. Quantification of volatile compounds were carried out by comparison of peak areas to that of internal standard (5-nonanol) and the mean of two replicates is shown in this table with SD in parenthesis. Retention time (RT) of each compound is shown and its precision is based on the experimental procedure. Identification scale of each compound (Id) is based on: 1, identified (mass spectrum and RT were in accordance with standards); 2, tentatively identified (mass spectrum matched in the standard NIST 2017 library and RT matched with literature); 3, tentatively identified (mass spectrum agreed with the standard NIST 2017). -, not detected.

| Ref | Volatile compound                                                  | CAS number | RT (min) | Id | Concentration of volatile compounds ( $\mu\text{g L}^{-1}$ ) |             |             |                        |             |               |                           |             |             |                            |             |             |                      |             |             |                          |            |             |                     |             |             |
|-----|--------------------------------------------------------------------|------------|----------|----|--------------------------------------------------------------|-------------|-------------|------------------------|-------------|---------------|---------------------------|-------------|-------------|----------------------------|-------------|-------------|----------------------|-------------|-------------|--------------------------|------------|-------------|---------------------|-------------|-------------|
|     |                                                                    |            |          |    | Uninoculated media                                           |             |             | <i>S. equorum</i> EN21 |             |               | <i>B. atrophaeus</i> L193 |             |             | <i>Peribacillus</i> sp. N3 |             |             | <i>P. segetis</i> P6 |             |             | <i>B. velezensis</i> XT1 |            |             | <i>P. vulpis</i> Z8 |             |             |
|     |                                                                    |            |          |    | MOLP                                                         | SG          | TSa         | MOLP                   | SG          | TSa           | MOLP                      | SG          | TSa         | MOLP                       | SG          | TSa         | MOLP                 | SG          | TSa         | MOLP                     | SG         | TSa         | MOLP                | SG          | TSa         |
| 1   | Acetone                                                            | 67-64-1    | 2.184    | 1  | 4.69 (0.7)                                                   | 4.13 (0.0)  | 3.19 (0.3)  | 28.91 (8.6)            | 9.33 (0.3)  | 22.19 (8.9)   | 7.81 (1.7)                | 4.33 (1.5)  | 3.33 (0.5)  | 10.2 (0.2)                 | 9.00 (0.2)  | 1.78 (0.5)  | 3.1 (1.2)            | 3.32 (0.2)  | 1.56 (0.1)  | 6.19 (0.4)               | 3.9 (0.2)  | 3.24 (0.3)  | 3.73 (0.4)          | 4.46 (0.1)  | 3.57 (0.1)  |
| 2   | Butanal                                                            | 123-72-8   | 2.649    | 2  | 2.83 (0.5)                                                   | -           | -           | -                      | -           | -             | -                         | -           | -           | -                          | -           | -           | -                    | -           | -           | -                        | -          | -           | -                   | -           | -           |
| 3   | Ethyl Acetate                                                      | 141-78-6   | 2.738    | 1  | 22.99 (2.8)                                                  | 30.07 (0.7) | 24.93 (1.8) | 26.6 (5.3)             | 29.5 (2.3)  | 31.68 (13.1)  | 12.5 (1.0)                | 2.82 (0.7)  | 14.16 (0.3) | 19.54 (0.5)                | 26.79 (1.1) | 17.49 (1.1) | 27.45 (5.4)          | 17.37 (1.3) | 18.76 (0.8) | 23.02 (2.3)              | 16.3 (1.1) | 14.29 (0.9) | 15.33 (0.8)         | 24.33 (0.6) | 18.3 (1.0)  |
| 4   | Methyl Acetate                                                     | 79-20-9    | 2.277    | 1  | -                                                            | 0.62 (0.0)  | -           | -                      | -           | -             | -                         | -           | -           | -                          | -           | -           | -                    | -           | -           | -                        | -          | -           | -                   | -           | -           |
| 5   | 2-Butanone                                                         | 78-93-3    | 2.877    | 2  | 4.67 (0.6)                                                   | 1.46 (0.1)  | 2.71 (0.5)  | 4.19 (0.7)             | 1.26 (0.3)  | 3.6 (1.4)     | 5.43 (0.2)                | 3.04 (0.9)  | 4.12 (0.0)  | 5.1 (0.3)                  | 2.02 (0.2)  | 3.38 (0.7)  | 8.72 (1.8)           | 2.63 (0.1)  | 4.43 (0.2)  | 5.12 (0.4)               | 1.26 (0.0) | 2.15 (0.2)  | 8.02 (0.1)          | 3.36 (0.2)  |             |
| 6   | 2-Methylbutanal                                                    | 96-17-3    | 3.024    | 1  | -                                                            | 0.58 (0.4)  | 4.22 (0.3)  | 2.17 (0.3)             | 2.24 (0.3)  | -             | -                         | -           | -           | 1.34 (0.5)                 | 2.55 (0.1)  | -           | -                    | -           | -           | -                        | -          | -           | 3.44 (1.4)          | -           | 3.56 (0.1)  |
| 7   | 3-Methylbutanal                                                    | 590-86-3   | 3.078    | 2  | 28.69 (8.0)                                                  | 2.45 (0.0)  | 20.81 (2.0) | 6.84 (0.8)             | 10.74 (0.8) | 4.96 (2.4)    | -                         | -           | -           | 5.04 (1.1)                 | 3.44 (0.3)  | -           | -                    | -           | -           | 1.81 (0.2)               | -          | -           | 2.48 (0.6)          | -           | 5.39 (0.2)  |
| 8   | 2,3-Butanedione                                                    | 431-03-8   | 4.141    | 1  | 1.51 (0.2)                                                   | 0.51 (0.0)  | 1.39 (0.1)  | -                      | -           | -             | 10.59 (1.8)               | 6.01 (1.5)  | 3.49 (1.4)  | 20.05 (4.7)                | 3.92 (0.2)  | -           | -                    | -           | -           | 9.26 (0.1)               | 8.47 (0.1) | 5.65 (0.2)  | -                   | -           | -           |
| 9   | 2-Methyl-2-butenal                                                 | 1115-11-3  | 7.461    | 1  | 1.02 (0.0)                                                   | -           | -           | -                      | -           | -             | -                         | -           | -           | -                          | -           | -           | -                    | -           | -           | -                        | -          | -           | -                   | -           | -           |
| 10  | Isopentanol                                                        | 123-51-3   | 12.490   | 1  | -                                                            | -           | -           | 34.32 (2.1)            | 73.41 (3.5) | 110.63 (27.7) | 1.79 (0.1)                | -           | -           | 7.68 (0.2)                 | 1.06 (0.3)  | 0.77 (0.3)  | 2.41 (0.5)           | -           | 3.07 (0.1)  | -                        | -          | -           | 6.11 (1.1)          | -           | -           |
| 11  | Isopentyl acetate                                                  | 123-92-2   | 8.497    | 1  | -                                                            | -           | -           | 4.07 (1.2)             | 1.60 (0.2)  | 3.05 (0.6)    | -                         | -           | -           | 0.97 (0.0)                 | -           | -           | -                    | -           | -           | -                        | -          | -           | 2.11 (0.2)          | -           | -           |
| 12  | 1-Butanol                                                          | 71-36-3    | 9.911    | 1  | 4.26 (0.2)                                                   | 1.15 (0.0)  | 8.01 (0.3)  | 27.24 (2.4)            | 1.97 (0.2)  | 16.05 (4.2)   | 46.91 (8.0)               | 4.5 (0.9)   | 16.92 (0.1) | 6.12 (0.1)                 | -           | 1.00 (0.0)  | -                    | -           | -           | 15.09 (0.8)              | -          | -           | 4.83 (0.6)          | -           | 6.03 (0.3)  |
| 13  | Ethanol                                                            | 64-17-5    | 3.296    | 1  | -                                                            | 0.67 (0.0)  | -           | -                      | 0.95 (0.0)  | -             | -                         | 0.98 (0.2)  | 0.87 (0.0)  | -                          | -           | -           | -                    | -           | -           | -                        | -          | -           | 1.27 (0.2)          | -           | -           |
| 14  | D-Limonene                                                         | 5989-27-5  | 11.412   | 1  | 1.44 (0.2)                                                   | 0.69 (1.9)  | 2.34 (0.3)  | -                      | 5.23 (0.6)  | 6.81 (1.9)    | -                         | 1.88 (1.3)  | 2.23 (1.5)  | 1.06 (0.1)                 | 3.25 (2.0)  | 1.65 (1.9)  | -                    | -           | 8.67 (1.1)  | -                        | 1.31 (0.1) | 3.07 (0.7)  | -                   | -           | -           |
| 15  | Pyrazine                                                           | 290-37-9   | 12.308   | 2  | 1.61 (0.1)                                                   | -           | 4.59 (0.3)  | 2.87 (0.1)             | -           | 5.63 (1.0)    | 2.78 (0.2)                | -           | 5.9 (0.0)   | 1.69 (0.1)                 | -           | 3.96 (0.4)  | 2.88 (0.4)           | -           | 5.12 (0.1)  | 2.73 (0.2)               | -          | 5.36 (0.1)  | 1.32 (0.2)          | -           | 4.87 (0.2)  |
| 16  | Styrene                                                            | 100-42-5   | 14.215   | 1  | -                                                            | 0.58 (0.1)  | 0.6 (0.0)   | -                      | -           | -             | -                         | -           | -           | 0.74 (0.3)                 | 1.98 (0.7)  | -           | -                    | -           | -           | -                        | -          | -           | -                   | -           | -           |
| 17  | Pyrazine, methyl-                                                  | 109-08-0   | 14.670   | 2  | 1.78 (0.1)                                                   | -           | 4.05 (0.2)  | 3.04 (0.1)             | -           | 5.05 (0.7)    | 3.11 (0.1)                | -           | 5.15 (0.2)  | 1.7 (0.1)                  | -           | 3.48 (0.1)  | 2.83 (0.2)           | -           | 4.57 (0.0)  | 2.92 (0.2)               | -          | 4.7 (0.0)   | 1.8 (0.2)           | -           | 4.41 (0.3)  |
| 18  | 2-Propanone, 1-hydroxy-                                            | 116-09-6   | 16.206   | 2  | 0.88 (0.1)                                                   | -           | 1.24 (0.3)  | -                      | -           | -             | -                         | -           | -           | 1.5 (0.0)                  | -           | 1.21 (0.3)  | 1.03 (0.0)           | -           | 1.06 (0.1)  | -                        | -          | -           | -                   | -           | -           |
| 19  | Pyrazine, 2,5-dimethyl-                                            | 123-32-0   | 17.162   | 2  | 13.69 (0.8)                                                  | -           | 49.48 (3.4) | 32.01 (0.3)            | -           | 61.01 (5.2)   | 30.77 (1.4)               | -           | 66.3 (0.1)  | 9.92 (0.2)                 | -           | 36.62 (0.6) | 32.92 (5.1)          | 0.58 (0.0)  | 54.84 (0.1) | 25.57 (0.3)              | -          | 57.26 (0.1) | 15.05 (0.2)         | -           | 56.31 (0.8) |
| 20  | Pyrazine, 2-ethyl-5-methyl-                                        | 13360-64-0 | 20.167   | 2  | 1.26 (0.2)                                                   | -           | 1.75 (0.1)  | 2.23 (0.1)             | -           | 2.17 (0.0)    | 1.95 (0.0)                | -           | 2.38 (0.1)  | 0.96 (0.0)                 | -           | 1.16 (0.0)  | -                    | -           | 2.18 (0.0)  | 2.13 (0.1)               | -          | 2.13 (0.1)  | 1.15 (0.1)          | -           | 2.01 (0.2)  |
| 21  | Pyrazine, trimethyl-                                               | 14667-55-1 | 20.748   | 2  | 1.48 (0.1)                                                   | -           | 1.77 (0.2)  | 2.72 (0.1)             | -           | 2.29 (0.0)    | 2.45 (0.2)                | -           | 2.46 (0.1)  | 1.24 (0.1)                 | -           | 1.49 (0.1)  | 2.37 (0.3)           | -           | 2.11 (0.0)  | 2.45 (0.0)               | -          | 2.22 (0.0)  | 2.22 (0.2)          | -           | 2.92 (0.3)  |
| 22  | Pyrazine, 3-ethyl-2,5-dimethyl-                                    | 13360-65-1 | 22.467   | 2  | 1.05 (0.0)                                                   | -           | 1.38 (0.1)  | -                      | -           | 1.72 (0.1)    | 1.47 (0.1)                | -           | 1.56 (0.0)  | 0.84 (0.0)                 | -           | 1.04 (0.0)  | 1.42 (0.1)           | -           | 1.58 (0.0)  | 1.54 (0.1)               | -          | 1.53 (0.0)  | 3.23 (0.2)          | -           | 4.03 (0.2)  |
| 23  | 2-Ethyl-1-hexanol                                                  | 104-76-7   | 24.707   | 1  | -                                                            | -           | -           | -                      | -           | -             | -                         | 0.95 (0.3)  | 0.85 (0.0)  | -                          | -           | 1.2 (0.0)   | -                    | 0.73 (0.1)  | 6.93 (0.2)  | -                        | -          | -           | -                   | -           | -           |
| 24  | Acetic acid                                                        | 64-19-7    | 22.523   | 1  | 3.75 (3.0)                                                   | -           | -           | 180.23 (17.1)          | 25.58 (1.9) | 4.13 (2.0)    | 36.85 (7.1)               | 10.02 (6.5) | 3.56 (1.1)  | 32.85 (4.5)                | 30.8 (0.4)  | 1.26 (0.2)  | -                    | -           | -           | 21.9 (0.4)               | 6.07 (4.1) | 2.12 (0.0)  | -                   | -           | -           |
| 25  | Benzaldehyde                                                       | 100-52-7   | 25.552   | 1  | 39.82 (5.7)                                                  | 16.64 (0.6) | 52.89 (3.3) | 4.61 (0.4)             | 5.1 (0.1)   | -             | 1.11 (0.1)                | 0.45 (0.2)  | 0.58 (0.0)  | 5.31 (0.4)                 | 11.55 (1.0) | 0.37 (0.1)  | 2.03 (1.2)           | -           | -           | 7.04 (1.2)               | 3.0 (0.9)  | -           | 1.72 (0.2)          | 2.71 (0.4)  | -           |
| 26  | Ethanol, 2-(2-ethoxyethoxy)-                                       | 111-90-0   | 29.655   | 2  | 3.02 (0.5)                                                   | 2.83 (0.2)  | 2.91 (0.1)  | 2.43 (0.3)             | 1.55 (0.2)  | 2.31 (0.8)    | 3.28 (1.2)                | 1.5 (0.1)   | 2.33 (0.0)  | 2.37 (0.1)                 | 3.58 (1.5)  | 1.8 (0.1)   | 2.63 (0.3)           | 1.38 (0.2)  | 1.43 (0.1)  | 3.55 (0.4)               | 1.68 (0.0) | 1.88 (0.2)  | 2.66 (0.5)          | 2.8 (0.6)   | 1.9 (0.3)   |
| 27  | Butanoic acid                                                      | 107-92-6   | 30.077   | 1  | 1.09 (0.8)                                                   | -           | -           | 18.50 (1.3)            | -           | -             | 4.03 (1.4)                | -           | -           | 4.92 (0.4)                 | -           | -           | -                    | -           | -           | 3.95 (0.5)               | -          | -           | -                   | -           | -           |
| 28  | Acetophenone                                                       | 98-86-2    | 30.536   | 2  | 1.33 (0.0)                                                   | -           | -           | 1.57 (0.1)             | -           | -             | -                         | -           | -           | 1.04 (0.0)                 | -           | -           | -                    | -           | -           | 1.62 (0.1)               | -          | -           | -                   | -           | -           |
| 29  | Propanoic acid                                                     | 79-09-4    | 26.597   | 2  | -                                                            | -           | -           | 3.54 (0.3)             | -           | -             | -                         | -           | -           | 1.22 (0.2)                 | 0.9 (0.2)   | -           | -                    | -           | -           | -                        | -          | -           | -                   | -           | -           |
| 30  | Isobutyric acid                                                    | 79-31-2    | 27.776   | 1  | -                                                            | -           | -           | 5.66 (0.6)             | 1.92 (0.2)  | -             | -                         | 1.61 (0.7)  | -           | 5.4 (0.2)                  | 4.76 (0.6)  | -           | -                    | -           | -           | -                        | 1.03 (0.4) | -           | 3.45 (0.1)          | 1.95 (0.1)  | -           |
| 31  | Propanoic acid, 2-methyl-, 3-hydroxy-, 2,2,4-trimethylpentyl ester | 77-68-9    | 38.727   | 3  | 3.20 (1.7)                                                   | 3.22 (0.8)  | 1.05 (0.1)  | -                      | -           | -             | -                         | -           | -           | 3.16 (0.9)                 | -           | -           | -                    | -           | -           | -                        | -          | -           | 2.95 (0.6)          | -           | -           |
| 32  | 2,2,4-Trimethyl-1,3-pentanediol diisobutyrate                      | 6846-50-0  | 39.014   | 3  | 7.24 (0.5)                                                   | 6.48 (0.5)  | 4.8 (4.8)   | -                      | -           | -             | -                         | -           | -           | 4.48 (1.2)                 | -           | -           | 1.22 (0.3)           | -           | -           | -                        | 1.17 (0.3) | -           | -                   | -           | -           |
| 33  | Butyl acetate                                                      | 123-86-4   | 6.763    | 2  | -                                                            | -           | -           | 2.43 (0.4)             | -           | 0.78 (0.2)    | -                         | -           | -           | 0.99 (0.1)                 | -           | -           | -                    | -           | -           | -                        | -          | -           | -                   | -           | -           |
| 34  | 1,3-Di-tert-butylbenzene                                           | 1014-60-4  | 21.849   | 2  | -                                                            | -           | -           | -                      | 2.26 (0.1)  | 5.49 (0.4)    | 1.47 (0.1)                | 5.46 (0.4)  | -           | 1.14 (0.2)                 | 1.1 (0.0)   | 1.28 (0.0)  | -                    | 0.47 (0.1)  | 4.98 (0.9)  | 3.09 (0.0)               | 1.87 (0.4) | 2.17 (0.4)  | -                   | 2.18 (0.1)  |             |
| 35  | Pyrazine, 2,6-diethyl-                                             | 13067-27-1 | 22.605   | 2  | -                                                            | -           | -           | 1.64 (0.1)             | -           | -             | -                         | -           | -           | -                          | -           | -           | -                    | -           | -           | -                        | -          | -           | -                   | -           | -           |
| 36  | 2-Acetylthiazole                                                   | 24295-03-2 | 30.447   | 2  | -                                                            | -           | -           | 2.20 (0.1)             | -           | -             | -                         | -           | -           | -                          | -           | -           | -                    | -           | -           | -                        | -          | -           | -                   | -           | -           |
| 37  | 3-Methylbutanoic acid                                              | 503-74-2   | 31.666   | 1  | -                                                            | -           | -           | 14.95 (1.5)            | 21.29 (2.7) | 5.73 (0.9)    | 8.44 (1.6)                | 8.79 (3.4)  | 3.71 (1.4)  | 11.74 (0.5)                | 16.11 (2.3) | 1.74 (0.2)  | -                    | -           | -           | 3.44 (0.4)               | 6.80 (0.5) | 3.4 (0.3)   | 9.08 (1.6)          | 1.13 (0.1)  | 2.25 (0.1)  |
| 38  | Hexanoic acid                                                      | 142-62-1   | 38.020   | 1  | -                                                            | -           | -           | 3.25 (0.2)             | -           | -             | -                         | -           | -           | 0.74 (0.3)                 | -           | -           | -                    | -           | -           | -                        | -          | -           | -                   | -           | -           |
| 39  | Octanoic acid                                                      | 124-07-2   | 45.104   | 1  | -                                                            | -           | -           | 3.05 (0.1)             | -           | -             | -                         | -           | -           | 0.86 (0.0)                 | -           | -           | -                    | -           | -           | -                        | -          | -           | -                   | -           | -           |
| 40  | Nonanal                                                            | 124-19-6   | 20.509   | 1  | -                                                            | -           | -           | -                      | 2.76 (1.5)  | -             | -                         | -           | -           | -                          | -           | -           | -                    | -           | -           | -                        | -          | -           | -                   | -           | -           |
| 41  | Phenylethyl Alcohol                                                | 60-12-8    | 39.958   | 1  | -                                                            | -           | -           | -                      | 1.61 (0.2)  | 4.17 (0.2)    | 0.65 (0.0)                | -           | -           | 1.37 (0.0)                 | -           | -           | -                    | -           | -           | -                        | -          | -           | -                   | -           | -           |
| 42  | 2-Pentanone                                                        | 107-87-9   | 4.055    | 2  | -                                                            | -           | -           | -                      | 1.32 (0.2)  | 1.28 (0.0)    | -                         | -           | -           | -                          | -           | 0.79 (0.3)  | -                    | 1.28 (0.1)  | 3.27 (0.4)  | -                        | 2.44 (0.1) | -           | -                   | -           | -           |
| 43  | 2-Heptanone                                                        | 110-43-0   | 11.066   | 2  | -                                                            | -           | -           | -                      | -           | -             | 16.27 (0.7)               | 3.09 (0.2)  | 5.28 (0.3)  | -                          | -           | -           | -                    | -           | -           | 6.57 (0.7)               | 1.16 (0.0) | 2.88 (0.3)  | -                   | -           | -           |



**Fig S1.**

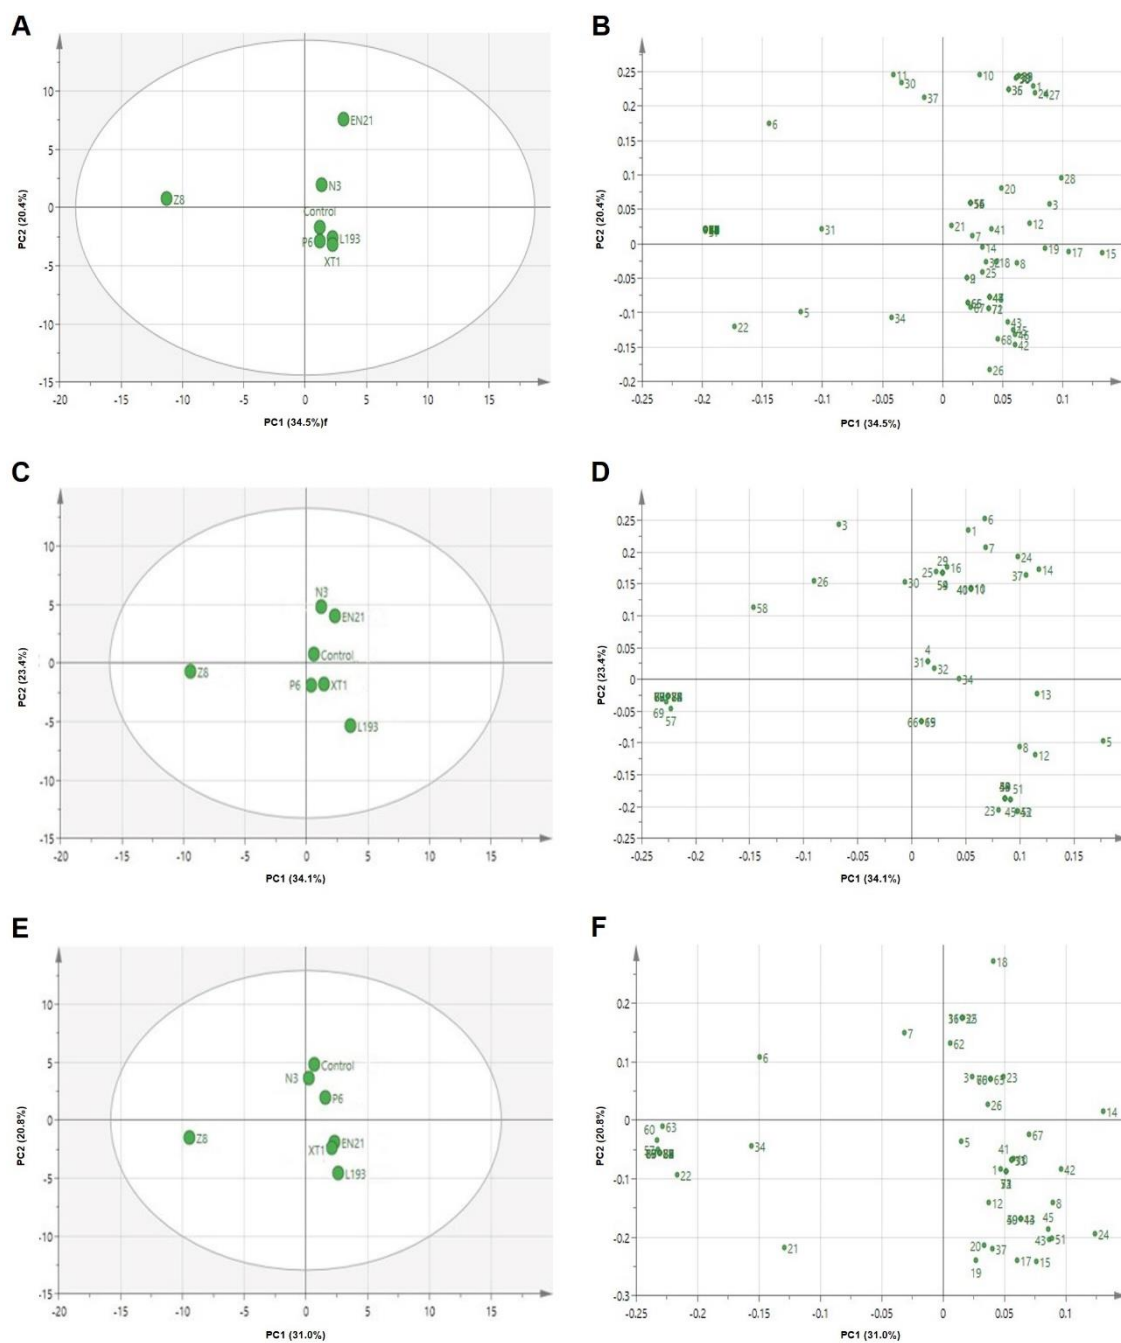

**Fig S2.**

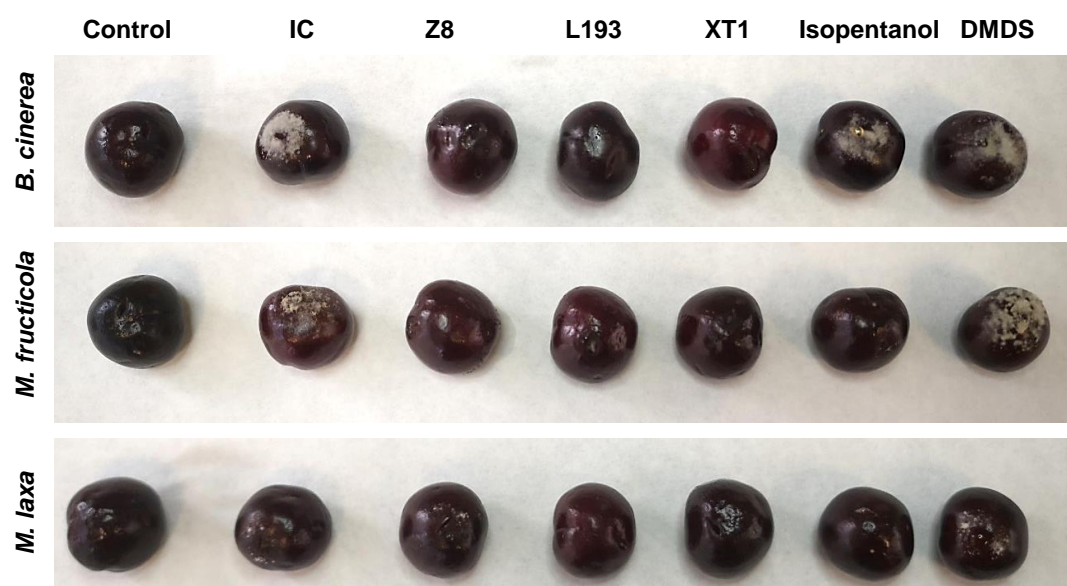

**Figure S1.** Principal component analysis (PCA) of volatile compounds obtained by HS-SPME and identified by GC/MS in *B. atrophaeus* L193 strain (L193), *B. velezensis* XT1 strain (XT1), *Peribacillus sp.* N3 strain (N3), *P. segetis* strain P6 (P6), *S. equorum* subsp. *equorum* EN21 strain (EN21) and *P. vulpis* Z8 strain (Z8) grouped by culture medium. (A-B) Score and loading plots of MOLP medium. (C-D) Score and loading plots of SG medium. (E-F) Score and loading plots of TSA medium. Each volatile compound is assigned to a reference number and can be checked in table S1.

**Figure S2.** Effects of the volatile organic compounds produced by *P. vulpis* Z8, *B. atrophaeus* L193 and *B. velezensis* XT1 cultured in MOLP medium and the synthetic compounds isopentanol and dimethyl disulphide (DMDS) on cherry fruits artificially inoculated with *M. laxa*, *M. fructicola* and *B. cinerea*. Control: control treatment, without bacterial VOCs or volatile synthetic compounds. IC: pathogen infection control, without VOCs treatment.
